# Supplementary material for: Genomic Analysis of a Community-Acquired Methicillin-Resistant Staphylococcus aureus Sequence Type 1 Associated with Caprine Mastitis
Source: MDPI journal article supplement (doi:10.3390/pathogens13010023), 2023-12-26
Supplement: s1 [file s1]

| Contig id                   | Start  | Stop   | Strand | Gene    | Sequence name                                      | Scope | Element type | Element subtype | Class | Subclass | Method | Target length | Ref. sequence length | % Coverage of ref. sequence | % Identity to reference sequence | Alignment length | Accession of closest sequence | Name of closest sequence                           |
|-----------------------------|--------|--------|--------|---------|----------------------------------------------------|-------|--------------|-----------------|-------|----------|--------|---------------|----------------------|-----------------------------|----------------------------------|------------------|-------------------------------|----------------------------------------------------|
| Staphylococcus_aureus_31_c1 | 38847  | 39779  | +      | lukE    | bi-component leukocidin LukED subunit E            | plu s | VIRULE NCE   | VIRULE NCE      | NA    | NA       | BLASTX | 311           | 311                  | 100.00                      | 99.68                            | 311              | RCV70079                      | bi-component leukocidin LukED subunit E            |
| Staphylococcus_aureus_31_c1 | 39784  | 40764  | +      | lukD    | bi-component leukocidin LukED subunit D            | plu s | VIRULE NCE   | VIRULE NCE      | NA    | NA       | BLASTX | 327           | 327                  | 100.00                      | 94.50                            | 327              | CAA73668                      | bi-component leukocidin LukED subunit D            |
| Staphylococcus_aureus_31_c1 | 52416  | 53120  | +      | splA    | serine protease SplA                               | plu s | VIRULE NCE   | VIRULE NCE      | NA    | NA       | BLASTX | 235           | 235                  | 100.00                      | 99.57                            | 235              | ABD31004                      | serine protease SplA                               |
| Staphylococcus_aureus_31_c1 | 53248  | 53967  | +      | splB    | serine protease SplB                               | plu s | VIRULE NCE   | VIRULE NCE      | NA    | NA       | BLASTX | 240           | 240                  | 100.00                      | 99.58                            | 240              | ABD31003                      | serine protease SplB                               |
| Staphylococcus_aureus_31_c1 | 427948 | 428883 | +      | lukS-PV | Panton-Valentine bi-component leukocidin subunit S | plu s | VIRULE NCE   | VIRULE NCE      | NA    | NA       | BLASTX | 312           | 312                  | 100.00                      | 99.68                            | 312              | AGW3387                       | Panton-Valentine bi-component leukocidin subunit S |
| Staphylococcus_aureus_31_c1 | 428888 | 429862 | +      | lukF-PV | Panton-Valentine bi-component leukocidin subunit F | plu s | VIRULE NCE   | VIRULE NCE      | NA    | NA       | BLASTX | 325           | 325                  | 100.00                      | 98.77                            | 325              | BAA24008                      | Panton-Valentine bi-component leukocidin subunit F |
| Staphylococcus_aureus_31_c2 | 321699 | 322418 | +      | sel     | staphylococcal enterotoxin type L                  | plu s | VIRULE NCE   | VIRULE NCE      | NA    | NA       | EXACTX | 240           | 240                  | 100.00                      | 100.00                           | 240              | AMG4053                       | staphylococcal enterotoxin type L                  |
| Staphylococcus_aureus_31_c2 | 322591 | 323388 | -      | sec2    | staphylococcal enterotoxin type C2                 | plu s | VIRULE NCE   | VIRULE NCE      | NA    | NA       | BLASTX | 266           | 266                  | 100.00                      | 99.25                            | 266              | AAA2662                       | staphylococcal enterotoxin type C2                 |
| Staphylococcus_aureus_31_c3 | 54324  | 57872  | +      | cna     | collagen adhesin Cna polysaccharide                | plu s | VIRULE NCE   | VIRULE NCE      | NA    | NA       | BLASTX | 1183          | 1183                 | 100.00                      | 98.99                            | 1183             | BAB96477                      | collagen adhesin Cna polysaccharide                |
| Staphylococcus_aureus_31_c3 | 79565  | 80614  | -      | icaC    | intercellular adhesin biosynthesis                 | plu s | VIRULE NCE   | VIRULE NCE      | NA    | NA       | EXACTX | 350           | 350                  | 100.00                      | 100.00                           | 350              | AUU5856                       | intercellular adhesin biosynthesis                 |

|                             |        |        |   |         |                                                                   |       |            |            |                    |                              |          |     |     |        |        |     |                 |                                                                   |
|-----------------------------|--------|--------|---|---------|-------------------------------------------------------------------|-------|------------|------------|--------------------|------------------------------|----------|-----|-----|--------|--------|-----|-----------------|-------------------------------------------------------------------|
| Staphylococcus_aureus_31_c3 | 124522 | 126048 | + | aur     | /export protein IcaC zinc metalloprotease aureolysin              | plu s | VIRULE NCE | VIRULE NCE | NA                 | NA                           | BLAST X  | 509 | 509 | 100.00 | 99.41  | 509 | EHO93748.1      | /export protein IcaC zinc metalloprotease aureolysin              |
| Staphylococcus_aureus_31_c3 | 361426 | 362400 | - | hlg B   | bi-component gamma-hemolysin HlgAB/HlgCB subunit B                | plu s | VIRULE NCE | VIRULE NCE | NA                 | NA                           | BLAST X  | 325 | 325 | 100.00 | 97.54  | 325 | CAA57278.1      | bi-component gamma-hemolysin HlgAB/HlgCB subunit B                |
| Staphylococcus_aureus_31_c3 | 362405 | 363349 | - | hlg C   | HlgCB subunit C                                                   | plu s | VIRULE NCE | VIRULE NCE | NA                 | NA                           | BLAST X  | 315 | 315 | 100.00 | 97.46  | 315 | CAA57277.1      | HlgCB subunit C                                                   |
| Staphylococcus_aureus_31_c3 | 363920 | 364846 | - | hlg A   | bi-component gamma-hemolysin HlgAB subunit A multidrug efflux MFS | plu s | VIRULE NCE | VIRULE NCE | NA                 | NA                           | EXACTX   | 309 | 309 | 100.00 | 100.00 | 309 | AUU5466.9.1     | bi-component gamma-hemolysin HlgAB subunit A multidrug efflux MFS |
| Staphylococcus_aureus_31_c3 | 597306 | 598745 | + | lmr S   | transporter LmrS multidrug efflux MATE                            | plu s | STRESS     | BIOCIDE    | MACROLIDE/PHENICOL | CHLORAMPHENICOL/ERYTHROMYCIN | BLAST X  | 480 | 480 | 100.00 | 99.38  | 480 | AAW3846.4.1     | transporter LmrS multidrug efflux MATE                            |
| Staphylococcus_aureus_31_c4 | 129581 | 130933 | - | mepA    | transporter MepA tetracycline efflux MFS                          | plu s | AMR        | AMR        | EFFLUX             | EFFLUX                       | BLAST X  | 451 | 451 | 100.00 | 99.33  | 451 | BAB41547.1      | transporter MepA tetracycline efflux MFS                          |
| Staphylococcus_aureus_31_c4 | 360925 | 362274 | - | tet(38) | transporter Tet(38) staphylococcal                                | core  | AMR        | AMR        | TETRACYCLINE       | TETRACYCLINE                 | EXACTX   | 450 | 450 | 100.00 | 100.00 | 450 | WP_00110.0294.1 | transporter Tet(38) staphylococcal                                |
| Staphylococcus_aureus_31_c4 | 429132 | 429854 | - | seh     | enterotoxin type H beta-lactam sensor/signal transducer           | plu s | VIRULE NCE | VIRULE NCE | NA                 | NA                           | EXACTX   | 241 | 241 | 100.00 | 100.00 | 241 | AAA1977.7.1     | enterotoxin type H beta-lactam sensor/signal transducer           |
| Staphylococcus_aureus_31_c4 | 448421 | 449395 | - | mecR1   | MecR1                                                             | core  | AMR        | AMR        | BETA-LACTAM        | METHICILLIN                  | PARTIALX | 325 | 585 | 55.56  | 100.00 | 325 | WP_00095.2923.1 | MecR1                                                             |
| Staphylococcus_aureus_31_c4 | 449495 | 451498 | + | mecA    | PBP2a family beta-                                                | core  | AMR        | AMR        | BETA-LACTAM        | METHICILLIN                  | EXACTX   | 668 | 668 | 100.00 | 100.00 | 668 | WP_00072.1310.1 | PBP2a family beta-                                                |

|                             |     |     |   |     |                                                                        |     |        |        |    |    |       |     |     |        |        |     |     |                                                                        |                    |
|-----------------------------|-----|-----|---|-----|------------------------------------------------------------------------|-----|--------|--------|----|----|-------|-----|-----|--------|--------|-----|-----|------------------------------------------------------------------------|--------------------|
|                             |     |     |   |     | lactam-resistant<br>peptidoglycan<br>transpeptidase MecA<br>complement |     |        |        |    |    |       |     |     |        |        |     |     | lactam-resistant<br>peptidoglycan<br>transpeptidase MecA<br>complement |                    |
| Staphylococcus_aureus_31_c5 | 830 | 833 |   |     | inhibitor                                                              | plu | VIRULE | VIRULE |    |    | EXAC  |     |     |        |        |     |     | ADL23798                                                               | inhibitor          |
|                             | 25  | 72  | - | scn | SCIN-A                                                                 | s   | NCE    | NCE    | NA | NA | TX    | 116 | 116 | 100.00 | 100.00 | 116 | .1  | SCIN-A                                                                 |                    |
| Staphylococcus_aureus_31_c5 | 848 | 853 |   |     | staphylokinase                                                         | plu | VIRULE | VIRULE |    |    | BLAST |     |     |        |        |     |     | CAA24957                                                               | staphylokinase     |
|                             | 73  | 61  | - | sak | staphylococcal                                                         | s   | NCE    | NCE    | NA | NA | X     | 163 | 163 | 100.00 | 99.39  | 163 | .1  | staphylococcal                                                         |                    |
| Staphylococcus_aureus_31_c5 | 870 | 878 |   |     | enterotoxin type A                                                     | plu | VIRULE | VIRULE |    |    | EXAC  |     |     |        |        |     |     | BAV60816                                                               | enterotoxin type A |
|                             | 73  | 43  | - | sea | staphylococcal                                                         | s   | NCE    | NCE    | NA | NA | TX    | 257 | 257 | 100.00 | 100.00 | 257 | .1  | staphylococcal                                                         |                    |
| Staphylococcus_aureus_31_c5 | 121 | 122 |   |     | enterotoxin type Q                                                     | plu | VIRULE | VIRULE |    |    | BLAST |     |     |        |        |     |     | EYN56163                                                               | enterotoxin type Q |
|                             | 762 | 487 | + | seq | staphylococcal                                                         | s   | NCE    | NCE    | NA | NA | X     | 242 | 242 | 100.00 | 98.76  | 242 | .1  | staphylococcal                                                         |                    |
| Staphylococcus_aureus_31_c5 | 122 | 123 |   |     | enterotoxin type K                                                     | plu | VIRULE | VIRULE |    |    | BLAST |     |     |        |        |     |     | AAW3643                                                                | enterotoxin type K |
|                             | 514 | 236 | + | sek | delta-hemolysin                                                        | s   | NCE    | NCE    | NA | NA | X     | 241 | 242 | 99.59  | 97.10  | 241 | 9.1 | delta-hemolysin                                                        |                    |
| Staphylococcus_aureus_31_c5 | 143 | 143 |   |     |                                                                        | plu | VIRULE | VIRULE |    |    | BLAST |     |     |        |        |     |     | AGU62139                                                               |                    |
|                             | 296 | 373 | - | hld |                                                                        | s   | NCE    | NCE    | NA | NA | X     | 26  | 26  | 100.00 | 96.15  | 26  | .1  |                                                                        |                    |
